**Disparate patterns of thermal adaptation between life stages in temperate vs. tropical**

***Drosophila melanogaster***

Brent L. Lockwood\*, Tarun Gupta, and Rosemary Scavotto

Department of Biology, The University of Vermont, Burlington, VT 05405

\*Corresponding author: Brent.Lockwood@uvm.edu

# Summary

Many terrestrial ectothermic species exhibit limited variation in upper thermal tolerance across latitude. However, these trends may not signify limited adaptive capacity to increase thermal tolerance in the face of climate change. Instead, thermal tolerance may be similar among populations because behavioral thermoregulation by mobile organisms or life stages may buffer natural selection for thermal tolerance. We compared thermal tolerance of adults and embryos among natural populations of *Drosophila melanogaster* from a broad range of thermal habitats around the globe to assess natural variation of thermal tolerance in mobile vs. immobile life stages. We found no variation among populations in adult thermal tolerance, but embryonic thermal tolerance was higher in tropical than in temperate regions. Average maximum temperature of the warmest month of the year predicted embryonic thermal tolerance in tropical but not temperate sites. We further report that embryos live closer to their upper thermal limits than adults—i.e., thermal safety margins are smaller for embryos than adults. F1 hybrid embryos from crosses between temperate and tropical populations had thermal tolerance that matched that of tropical embryos, suggesting phenotypic dominance of heat-tolerant alleles. Together our findings demonstrate that embryonic thermal tolerance readily evolves and suggest that selection for thermal tolerance may be limited in adults. Further, our results suggest that thermal traits should be measured across life stages in order to better predict adaptive limits.

**Key words:** *Drosophila*, embryo, heat tolerance, phenotypic dominance, thermal adaptation, thermal safety margin

## Introduction

Extreme temperatures, which may be encountered at the edge of a species' geographic range (Hilbish *et al.* 2010) or episodically during the hottest or coldest days of the year (Hoffmann 2010; Kingsolver, Diamond & Buckley 2013; Dowd, King & Denny 2015; Buckley & Huey 2016), can cause populations to experience mortality (Helmuth *et al.* 2002; Denny, Miller & Harley 2006) and ultimately lead to thermal adaptation (Lenski & Bennett 1993; Mongold, Bennett & Lenski 1999; Hangartner & Hoffmann 2015). However, recent work suggests that thermal adaptation of upper thermal limits might be evolutionarily constrained (Hoffmann, Chown & Clusella-trullas 2013; Schou *et al.* 2014; Hangartner & Hoffmann 2015; Kristensen *et al.* 2015; van Heerwaarden, Kellermann & Sgrò 2016), such that the evolution of increased heat tolerance might be a relatively slow process that takes many millions of years to achieve (Kellermann *et al.* 2012). If this is the case, global climate change, which has led to rapid increases in mean temperatures and the frequency of extreme thermal events (Katz & Brown 1992; Meehl *et al.* 2000; Cai *et al.* 2014), may cause shifts in geographic distributions (Rank & Dahlhoff 2002; Burrows *et al.* 2011; Thomas *et al.* 2012; Sunday, Bates & Dulvy 2012) as populations may not be able to adapt fast enough to persist in hotter environments (Jezkova & Wiens 2016).

But thermal adaptation depends on the strength of selection (Bennett, Lenski & Mittler 1992; Rudolph *et al.* 2010), and studies that focus on thermal tolerance of mobile organisms or life stages may overestimate the degree to which these organisms encounter thermal selection in nature. In other words, thermal safety margins—i.e., the difference between upper thermal limits and maximum habitat temperature—may be larger than predicted because thermal environmental heterogeneity allows mobile organisms to avoid thermal extremes via behavioral

thermoregulation (Dillon *et al.* 2009; Gunderson & Leal 2012; Buckley, Ehrenberger & Angilletta 2015; Llewelyn *et al.* 2016; Munoz *et al.* 2016). To date, there have been relatively few studies that examine thermal tolerance in immobile organisms or life stages, particularly in the terrestrial realm (Angilletta *et al.* 2013; MacLean *et al.* 2016), and immobile organisms may represent ideal study systems to investigate the evolutionary potential of thermal tolerance. In support of this conjecture, broad scale patterns of thermal tolerance are more tightly correlated with habitat temperatures in marine systems than in terrestrial systems (Sunday, Bates & Dulvy 2011), perhaps due to the more limited range of thermal microhabitats in the marine realm (Denny *et al.* 2011) that makes behavioral thermoregulation a less effective buffering mechanism.

Here we sought to compare adult and embryonic heat tolerance among populations of fruit flies, *Drosophila melanogaster*, from a broad range of thermal habitats across the world to ascertain the degree to which thermal selection has shaped the evolution of thermal tolerance across immobile vs. mobile life stages. Adult thermal tolerance has been extensively studied in natural populations of *D. melanogaster* (Hoffmann, Anderson & Hallas 2002; Hoffmann & Weeks 2007; Sgro *et al.* 2010; Adrion, Hahn & Cooper 2015; Buckley & Huey 2016), but to a large extent the thermal physiology of the early embryonic life stage of *D. melanogaster* has not been characterized in natural populations (Kristensen *et al.* 2015). Studies of lab-bred *D. melanogaster* have shown that early embryos (0 – 2 hours post-fertilization) are more thermally sensitive than later stages (Walter, Biessmann & Petersen 1990), perhaps due to the reduced heat-shock response in early embryos (Graziosi *et al.* 1980; Welte *et al.* 1993). Thus, we compared heat tolerance of adults and early stage embryos to determine whether or not differences in thermal sensitivity, as well as mobility, lead to different patterns of thermal adaptation across life stages. The thermal environment of *D. melanogaster* can change rapidly

(+18°C h<sup>-1</sup>) and reach extreme values (> 40°C) (Feder, Blair & Figueras 1997; Terblanche *et al.* 2011). Therefore, we designed our thermal stress experiments to mimic sudden (acute) changes in temperature that are characteristic of the variable thermal environments that flies experience in nature (Terblanche *et al.* 2011). We report higher embryonic thermal tolerance in tropical (hotter) vs. temperate (cooler) populations but no difference in adult thermal tolerance, and thus we demonstrate that selection for thermal tolerance likely varies across life stages. Moreover, our data suggest that there is significant adaptive variation for upper thermal tolerance in natural populations in the earliest and most thermally sensitive life stage.

## **Materials and methods**

### **Fly strains**

We obtained 19 isofemale genetic lines that were collected from temperate locations in the USA as a generous gift from B.S. Cooper and K.L. Montooth: 6 lines from Raleigh, NC (NC); 5 lines from Beasley Orchard, IN (IN); and 8 lines from East Calais, VT (VT). The creation of these lines has been previously described (Cooper, Hammad & Montooth 2014). We obtained 5 isofemale lines from the *Drosophila* Species Stock Center at the University of California, San Diego that were collected from tropical locations around the world: 1 line each from Accra, Ghana (GH); Mumbai, India (MU); Guam, USA (GU); Chiapas, Mexico (CH); and Monkey Hill, St. Kitts (SK). Geographic coordinates of collection locations and stock numbers of isofemale lines are provided in Supplementary Table S1. We maintained flies under common-garden conditions on cornmeal-yeast-molasses medium at 25°C on a 12:12 light cycle for at least two generations prior to measuring thermal tolerance.

### **Adult critical thermal maximum (CT<sub>max</sub>)**

We assayed thermal tolerance of adult male flies by measuring the temperature at which flies incurred a loss of motor response along a heat ramp—i.e., the critical thermal maximum ( $CT_{max}$ ). 3 to 5 day-old adult male flies were individually placed into glass vials with rubber stoppers and submerged in a water bath that was programmed to increase  $0.1^{\circ}C\ min^{-1}$  upwards from  $25^{\circ}C$ . We chose this rate of temperature increase based on previously published studies (Chown *et al.* 2009; Sgro *et al.* 2010; Kellermann *et al.* 2012) and to mimic the variable thermal environments that flies encounter in nature (Terblanche *et al.* 2011). Flies were regularly checked for responsiveness along the heat ramp by gently tapping the vial, and the temperature at which a fly lost the ability to move was recorded. We scored  $CT_{max}$  for each genotype via a least-squares regression model of the logistic equation among 10 flies per genotype and extrapolated  $CT_{max}$  from the inflection points of the logistic curves. We conducted these curve fitting analyses in GraphPad Prism 7 for Mac OS X (GraphPad Software, La Jolla, CA).

#### **Embryonic thermal tolerance ( $LT_{50}$ )**

We assayed embryonic thermal tolerance by measuring survival (hatching success) of early stage embryos, 0 to 1 h post-fertilization, exposed to a 45-minute heat treatment across a range of temperatures, from  $25^{\circ}C$  to  $42^{\circ}C$ . We chose this assay method because embryos do not possess behavioral characteristics that would permit the assessment of thermal tolerance via  $CT_{max}$ , and measuring hatching success allowed us to overcome this obstacle. Previous studies conducted in a wide range of species have shown that temperature adaptive variation in survival following heat stress follows the same trends as  $CT_{max}$  (Huey, Partridge & Fowler 1991; Gilchrist, Huey & Partridge 1997; Stillman & Somero 2000; Somero 2002; Stenseng *et al.* 2005; Braby & Somero 2006; Miller & Stillman 2012; Dowd & Somero 2013). We designed our heat treatments to mimic sudden increases in temperature that frequently occur in nature where the temperature of

necrotic fruit can increase rapidly on hot days (Feder *et al.* 1997; Terblanche *et al.* 2011). 3 to 5 day-old adult flies were allowed to mate and lay eggs on grape juice agar plates for 1 h at 25°C. Egg plates were then wrapped in Parafilm, submerged in a water bath, and heat shocked for 45 minutes. The rate of temperature change averaged +0.4°C min<sup>-1</sup>. This rate of increase is within the range of measured rates of change in nature (Feder *et al.* 1997). Following heat shock, 20 eggs were transferred on a piece of grape juice agar to fresh food vials and placed at 25°C. Hatching success was scored as the proportion of larvae that successfully hatched by 48 h. We conducted 4 to 6 replicate treatments at each of 9 temperatures (25°C, 28°C, 30°C, 32°C, 34°C, 36°C, 38°C, 40°C, and 42°C) for each genotype. We used these data to calculate the lethal temperature at which 50% of the embryos failed to hatch (LT<sub>50</sub>) via a least-squares regression model of the logistic equation. In our logistic model, we allowed the y-intercept to vary between 0 and 1 and extrapolated the LT<sub>50</sub> from the inflection point of the logistic curve fit. This approach allowed us to infer thermal tolerance independently from other confounding factors that may influence the measurement of hatching success, such as the presence of unfertilized eggs. We conducted these curve fitting analyses in GraphPad Prism 7.

#### **PCA of bioclimatic variables**

We examined the correspondence of adult and embryonic thermal tolerance to local climate conditions by examining the variation among our collection sites in 19 bioclimatic (Bioclim) variables. Bioclim variables represent biologically meaningful climate predictors that are derived from monthly temperature and rainfall data from the years 1960 to 1990 (Busby 1991). We downloaded Bioclim variables from the WorldClim database (Hijmans *et al.* 2005) ([www.worldclim.org](http://www.worldclim.org)) that corresponded to the GPS coordinates of the collection sites of each population (see Table S1). Because Bioclim variables tend to covary, we used a principal

components analysis (PCA) to characterize the major axes of variation in climate among our sites. We then conducted a multiple least-squares regression analysis to assess the degree to which variation in thermal tolerance could be explained by the primary principal components of these climate data. We conducted these analyses in R version 3.3.2 (Team 2016).

### **Statistical comparisons of thermal tolerance and thermal safety margins**

We compared adult ( $CT_{max}$ ) and embryonic ( $LT_{50}$ ) thermal tolerances among temperate sites (VT, IN, and NC) and all tropical sites pooled together (CH, SK, GH, MU, and GU) with ANOVA. Pairwise differences were assessed with Tukey's multiple comparison post-hoc test. We report our data as mean values with 95% confidence intervals. We calculated thermal safety margins as the difference between thermal tolerance (adult  $CT_{max}$  or embryo  $LT_{50}$ ) and maximum temperature of the warmest month ( $T_{max}$ ) at each site (see above for description of Bioclim data). Fine-scale spatial temperature data are not available for these collection sites, but while  $T_{max}$  may not perfectly match the thermal environment experienced by flies, variation in  $T_{max}$  should reflect relative differences in the thermal environments among locations. We compared thermal safety margins across latitude, as in Kellerman et al. (Kellermann *et al.* 2012), between adults and embryos using non-linear least-squares regression followed by the extra sum-of-squares F-test to compare model fits. In a separate analysis, we assessed the main effects of region (temperate vs. tropical), life stage (adult vs. embryo), and their interaction on thermal safety margins via a 2-way ANOVA. Least-squares linear regression was used to assess the relationship between embryonic thermal tolerance and significant climate variables. ANCOVA was used to assess the difference in slopes of regression lines fit to data from temperate vs. tropical sites. We assessed the genetic basis of differences in embryonic thermal tolerance by conducting reciprocal crosses between the two parental strains that had the highest and lowest  $LT_{50}$ , Chiapas, MX (CH) and



Vermont, USA strain #12 (VT-12), respectively, and measured thermal tolerance of F1 progeny. We used logistic models to fit the hatching success data, as described above, and compared  $LT_{50}$ s of the parental strains and their F1 progeny by an extra sum-of-squares F-test of the extrapolated  $LT_{50}$ s. We conducted these analyses in GraphPad Prism 7.

## Results

### Thermal tolerance and thermal safety margins across life stages

We found no difference in adult thermal tolerance among all sites (Figs. 1B and 1C; ANOVA,  $F_{3,9} = 2.378$ ,  $P = 0.1375$ ), with an overall mean  $CT_{max}$  ( $\pm 95\%$  C.I.) of  $38.8 \pm 0.45^\circ\text{C}$ . Embryonic thermal tolerance ( $LT_{50}$ ) did not differ among the three temperate sites but was significantly higher in tropical vs. temperate embryos (Figs. 1D and 1E; ANOVA,  $F_{3,20} = 10.16$ ,  $P = 0.0003$ ; Tukey's test, VT vs. IN,  $q = 2.428$ ,  $P = 0.3416$ , VT vs. NC,  $q = 0.4268$ ,  $P = 0.9902$ , IN vs. NC,  $q = 2.666$ ,  $P = 0.2656$ , tropical vs. VT,  $q = 6.909$ ,  $P = 0.0005$ , tropical vs. IN,  $q = 4.04$ ,  $P = 0.0444$ , tropical vs. NC,  $q = 4.04$ ,  $P = 0.0005$ ). Overall, tropical embryos were more heat tolerant; the average  $LT_{50}$  was approximately  $1^\circ\text{C}$  higher in tropical embryos ( $35.8 \pm 0.45^\circ\text{C}$ ) than in temperate embryos ( $34.88 \pm 0.18^\circ\text{C}$ ). There was no significant relationship between adult  $CT_{max}$  and embryo  $LT_{50}$  (Fig. S1; Least-squares linear regression,  $R^2 = 0.0005$ ).

Thermal safety margins—i.e., the difference between thermal tolerance ( $CT_{max}$  or  $LT_{50}$ ) and maximum habitat temperature ( $T_{max}$ )—were consistently smaller for embryos than adults and smallest in the tropics. This pattern was consistent regardless of whether thermal safety margins were compared across latitude (Fig. 2A; Extra sum-of-squares F-test on fitness of two curves,  $F_{3,32} = 15.95$ ,  $P < 0.0001$ ; Non-linear least-squares regression, embryo,  $R^2 = 0.8019$ ,  $y = 0.01563x^2 - 0.7249x + 9.97$ , adult,  $R^2 = 0.6359$ ,  $y = 0.01437x^2 - 0.6424x + 12.44$ ) or by region

(temperate vs. tropical) (Fig. 2B; ANOVA, main effect of region,  $F_{1,34} = 6.482$ ,  $P = 0.0156$ , main effect of life stage,  $F_{1,34} = 11.15$ ,  $P = 0.002$ , region x life stage interaction,  $F_{1,34} = 0.0006$ ,  $P = 0.98$ ).

### **Climate variability and thermal tolerance**

While there is a consistent difference between our temperate and tropical sites in mean annual temperature, VT = 5.4°C, IN = 10.8°C, NC = 15.4°C, and all tropical =  $26.1 \pm 1.4^\circ\text{C}$  (mean  $\pm$  95% C.I.), a principal components analysis of 19 Bioclim variables indicated that the greatest difference in climate among the collection locations was in temperature seasonality—defined as the yearly standard deviation in temperature. PC1 explained 95.6% of the variation in climate data among the collection sites, and this pattern largely characterized the differences in climate between temperate vs. tropical sites (Fig. S2). Temperature seasonality was the variable with the top component loading of PC1, explaining 98% of the variation in PC1. There was a significant negative relationship between PC1 and embryonic heat tolerance (Multiple least-squares linear regression with PC1 and PC2 as covariates,  $F_{1,4} = 8.1474$ ,  $P = 0.0462$ ), but this pattern was driven by the bimodal distribution of LT<sub>50</sub>s between temperate vs. tropical sites and was not consistent with temperature seasonality within each geographic region (Fig. S3). PC2 explained 4% of the variation in climate data among collection sites, mostly characterizing the differences in climate among tropical sites (Fig. S2). Annual precipitation, precipitation of the wettest quarter, and precipitation of the wettest month were the top three component loadings of PC2, explaining 49%, 40%, and 8% of variation in PC2, respectively. But there was no significant relationship between PC2 and embryonic heat tolerance (Least-squares linear regression,  $F_{1,4} = 0.367$ ,  $P = 0.577$ ).

Maximum temperature of the warmest month (i.e., maximum habitat temperature or  $T_{\max}$ ) spanned a range of 8.4°C among all sites, from 25.7°C in Vermont, USA (VT) to 34.1°C in Chiapas, MX (CH). While this variation in  $T_{\max}$  explained only a small fraction of the variation in Bioclim variables among sites (0.0016% of the variation in PC1 and 0.00015% of the variation in PC2), previous studies have shown  $T_{\max}$  to be correlated with adult heat tolerance ( $CT_{\max}$ ) among many species of *Drosophila* (Kellermann *et al.* 2012). In contrast to this previous work, our populations of *D. melanogaster* showed no significant relationship between adult heat tolerance and  $T_{\max}$  (Fig. S4; Least-squares linear regression,  $R^2 = 0.055$ ). However, the embryonic life stage exhibited a different pattern than the adults, and the relationship between embryonic heat tolerance and  $T_{\max}$  was distinct between temperate and tropical regions (Fig. 3; ANCOVA,  $F_{1,4} = 10.26$ ,  $P = 0.0328$ ). Among temperate populations there was a 6°C range in  $T_{\max}$ , but this produced no correlated response in the thermal tolerance of embryos (Fig. 3; Least-squares regression,  $R^2 = 0.0015$ ,  $P = 0.9751$ ,  $y = 0.00282x + 34.82$ ). But among tropical populations, the approximate 4°C range in  $T_{\max}$  corresponded to a positive relationship between embryonic thermal tolerance and  $T_{\max}$  (Fig. 3; Least-squares regression,  $R^2 = 0.9478$ ,  $P = 0.0051$ ,  $y = 0.2199x + 28.75$ ).

### **Embryonic thermal tolerance in F1 progeny from Chiapas x Vermont**

Offspring from reciprocal genetic crosses between the most heat tolerant tropical genotype (CH) and the least heat tolerant temperate genotype (VT-12) had thermal tolerances that closely resembled that of the heat tolerant CH genotype, regardless of the direction of the cross (Fig. 4). Embryonic  $LT_{50}$ s of F1 progeny of both crosses ( $CH_{\text{♀}} \times VT_{\text{♂}} = 35.83^{\circ}\text{C}$  and  $VT_{\text{♀}} \times CH_{\text{♂}} = 35.80^{\circ}\text{C}$ ) were statistically indistinguishable from the  $LT_{50}$  of CH ( $36.24^{\circ}\text{C}$ ) but significantly

higher than the  $LT_{50}$  of VT-12 (34.23°C; Fig. 4; Logistic model, Extra sum-of-squares F-test on lower  $LT_{50}$  of VT-12,  $F_{3,166} = 6.695$ ).

## Discussion

Despite the potential for thermal adaptation across the broad range of thermal habitats represented in this study, our data suggest that natural selection on thermal tolerance does not act equally across life stages in *D. melanogaster*. Rather, we provide evidence of adaptive variation in upper thermal limits in the thermally sensitive and immobile embryonic life stage but not in the more thermally tolerant and mobile adult stage. This is perhaps not surprising, given that lower thermal tolerance in early embryos translates into smaller thermal safety margins. Thus, we predict that embryos encounter lethal temperatures more frequently than adults, particularly because embryos lack the ability to behaviorally avoid thermally stressful conditions, and this likely drives divergence in embryonic thermal tolerance between temperate and tropical populations.

Recent estimates of divergence in adult thermal tolerance among populations of *D. melanogaster* have brought into question the degree of adaptive potential in upper thermal limits in this species, as comparisons of populations across latitude have yielded mixed results depending on assay methods (Sgro *et al.* 2010) and the laboratory in which thermal tolerance was measured (Hoffmann *et al.* 2002; Hoffmann 2010; Buckley & Huey 2016). Our estimates of *D. melanogaster* adult male  $CT_{max}$  are consistent with previous reports (Gilchrist *et al.* 1997; Chown *et al.* 2009; Kellermann *et al.* 2012), and while we report novel findings on the adaptation of embryonic thermal tolerance, our results are not unprecedented. Coyne *et al.* (Coyne, Bundgaard & Prout 1983) reported a similar discrepancy in thermal adaptation between

mobile and immobile life stages among populations of *Drosophila pseudoobscura*—pupal thermal tolerance, but not adult thermal tolerance, was higher in populations from warmer locations. The interplay of population genetic factors in natural populations of *D. melanogaster* suggest that this species harbors a high level of genetic diversity (Karasov, Messer & Petrov 2010) and that natural selection has led to allelic divergence among populations across the genome (Hoffmann & Weeks 2007; Fabian *et al.* 2012; Adrion *et al.* 2015). In light of these trends in population genomics, and the adaptive variation in embryonic thermal tolerance presented in this study, it seems probable that there is significant natural variation of upper thermal limits in *D. melanogaster* but that this variation may only be revealed in the embryonic and other immobile life stages.

It is important to note that lab selection experiments in *D. melanogaster*, *Escherichia coli*, and marine copepods (*Tigriopus californicus*) that imposed strong selection on thermal tolerance reported significant potential for adaptation of upper thermal limits, but the response to selection eventually plateaued after many generations, presumably when standing genetic diversity had been exhausted (Huey *et al.* 1991; Gilchrist *et al.* 1997; Gilchrist & Huey 1999; Rudolph *et al.* 2010; Kelly, Sanford & Grosberg 2012; Hangartner & Hoffmann 2015). Thus, there may likely be potential for adaptation of upper thermal limits, and in natural populations greater levels of standing genetic variation may be able to sustain adaptive responses to thermal selection.

This study characterizes thermal tolerance among populations that span a large portion of the *D. melanogaster* biogeographic range in the northern hemisphere, and while there is clear evidence of adaptation of embryonic thermal tolerance between temperate and tropical regions, the patterns of thermal adaptation are not consistent within each region. Tropical embryos sampled from locations with higher  $T_{max}$  showed higher thermal tolerances, yet temperate

populations did not follow this trend. Why were there no observed differences in embryonic thermal tolerance among temperate populations when temperate sites spanned a broader range of thermal habitats than tropical populations? It is possible that gene flow between Vermont, Indiana, and North Carolina overwhelms local adaptation, but recent studies show evidence of adaptive divergence among *D. melanogaster* populations in eastern North America (Fabian *et al.* 2012; Bergland *et al.* 2016; Machado *et al.* 2016). Therefore, a more likely explanation is that seasonal fluctuations in the activity of temperate populations (Cogni *et al.* 2014), may limit the frequency at which temperate embryos encounter thermal selection. In addition, spatial and temporal microclimatic variability in temperate sites may provide more choices for females to lay their eggs at permissive temperatures (Allemand & David 1976; Dahlgaard, Hasson & Loeschcke 2001; Huey & Pascual 2009; Dillon *et al.* 2009). We also note that our data constitute thermal tolerances of multiple isofemale lines from each of the three temperate sites but just one isofemale line from each of the five tropical sites. Thus, we have not captured the full range of genetic variation at each tropical site. The fact that the tropical flies originated from geographically distant locations suggests that our observed differences in embryonic thermal tolerance between temperate and tropical populations represent consistent patterns of thermal adaptation. However, our observation that embryonic thermal tolerance positively correlates with maximum temperature at tropical sites is a result that warrants further investigation. It remains to be determined whether or not this pattern will hold when a greater sample of genetic diversity is surveyed at these tropical locations.

Investigations into the genetic basis of variation in thermal tolerance in natural populations have yielded somewhat conflicting results, depending on the species (Pereira, Barreto & Burton 2014; Sato *et al.* 2015) and the way thermal tolerance was measured (Gilchrist

& Huey 1999; Mitchell & Hoffmann 2010; Hangartner & Hoffmann 2015). In this study, embryonic LT<sub>50</sub> spanned a range of approximately 2°C among all genotypes, and crosses between genotypes at the high and low ends of this range produced F1 progeny that resembled the phenotype of the heat-tolerant parent. This result indicates phenotypic dominance of heat-tolerant alleles, at least for Chiapas vs. Vermont-12 embryos. This is a surprising result for two reasons. First, this inheritance pattern is not expected because thermal physiological traits are complex and depend on multiple interacting factors, such as lipid membrane composition (Dahlhoff & Somero 1993; Cooper *et al.* 2012, 2014), protein stability (Lockwood & Somero 2012; Fields *et al.* 2015; Leuenberger *et al.* 2017), and transcriptional and translational responses (Leemans *et al.* 2000; Lockwood, Sanders & Somero 2010; Tomanek & Zuzow 2010; Chen, Nolte & Schlotterer 2015; Kristensen *et al.* 2016). Accordingly, previous work has shown that *D. melanogaster* adult and larval thermal tolerance are quantitative traits influenced by at least 7 loci (Morgan & Mackay 2006; Sambucetti *et al.* 2013). Second, because we examined early *D. melanogaster* embryos at 0 – 1 h post-fertilization (hpf), and zygotic genome activation has been reported to not begin until approximately 2 hpf in this species (Tadros & Lipshitz 2009; Blythe & Wieschaus 2015), we expected thermal tolerance to be determined by maternal effects. Instead, we found embryonic thermal tolerance to match that of the Chiapas strain regardless of maternal genotype. This suggests that either (1) the zygotic genome is being activated earlier than expected in response to heat shock (Graziosi *et al.* 1980), which would reveal adaptive variation in zygotic gene expression, or (2) that the effect is mediated at the level of the chromosomes, perhaps due to thermally-induced DNA damage (Yao & Somero 2012) that differentially affects different genotypes (Svetec *et al.* 2016). Either way, the unknown genetic basis of embryonic thermal tolerance warrants future study.

330

### 331 **Author's Contributions**

332 BL conceived the ideas and designed the methodology; BL, TG, and RS collected the data; BL  
333 analyzed the data; BL wrote the manuscript. All authors gave final approval for publication.

334

### 335 **Acknowledgements**

336 We thank Kristi Montooth, Brandon Cooper, Cole Julick and the UC San Diego Drosophila  
337 Species Stock Center for providing fly stocks. We thank Andrew Nguyen for R code that was  
338 helpful in generating the map shown in Figure 1. We thank Melissa Pespeni and Brandon Cooper  
339 for helpful comments on this manuscript. This work was funded by the University of Vermont.

340

### 341 **Data Accessibility**

342 Fly stock information is included in Table S1, including geographical coordinates of sampling  
343 locations, stock numbers, and thermal tolerance data.

344



## References

- Adrion, J.R., Hahn, M.W. & Cooper, B.S. (2015) Revisiting classic clines in *Drosophila melanogaster* in the age of genomics. *Trends in Genetics*, **31**, 434–444.
- Allemand, R. & David, J.R. (1976) The circadian rhythm of oviposition in *Drosophila melanogaster*: a genetic latitudinal cline in wild populations. *Experientia*, **32**, 1403–1404.
- Angilletta, M.J., Zelic, M.H., Adrian, G.J., Hurliman, a. M. & Smith, C.D. (2013) Heat tolerance during embryonic development has not diverged among populations of a widespread species (*Sceloporus undulatus*). *Conservation Physiology*, **1**, cot018-cot018.
- Bennett, A.F., Lenski, R.E. & Mittler, J.E. (1992) Evolutionary Adaptation to Temperature . I . Fitness Responses of *Escherichia coli* to Changes in its Thermal Environment. *Evolution*, **46**, 16–30.
- Bergland, A.O., Tobler, R., Gonzalez, J., Schmidt, P. & Petrov, D. (2016) Secondary contact and local adaptation contribute to genome-wide patterns of clinal variation in *Drosophila melanogaster*. *Molecular Ecology*, **25**, 1157–1174.
- Blythe, S.A. & Wieschaus, E.F. (2015) Coordinating Cell Cycle Remodeling with Transcriptional Activation at the *Drosophila* MBT. *Current Topics in Developmental Biology*, **113**, 113–148.
- Braby, C.E. & Somero, G.N. (2006) Following the heart: temperature and salinity effects on heart rate in native and invasive species of blue mussels (genus *Mytilus*). *Journal of Experimental Biology*, **209**, 2554–2566.
- Buckley, L.B., Ehrenberger, J.C. & Angilletta, M.J. (2015) Thermoregulatory behaviour limits local adaptation of thermal niches and confers sensitivity to climate change. *Functional Ecology*, **29**, 1038–1047.

- Buckley, L.B. & Huey, R.B. (2016) How Extreme Temperatures Impact Organisms and the Evolution of their Thermal Tolerance. *Integrative and Comparative Biology* , 1–12.
- Burrows, M.T., Schoeman, D.S., Buckley, L.B., Moore, P., Poloczanska, E.S., Brander, K.M., Brown, C., Bruno, J.F., Duarte, C.M., Halpern, B.S., Holding, J., Kappel, C. V, Kiessling, W., O’Connor, M.I., Pandolfi, J.M., Parmesan, C., Schwing, F.B., Sydeman, W.J. & Richardson, A.J. (2011) The pace of shifting climate in marine and terrestrial ecosystems. *Science*, **334**, 652–655.
- Busby, J.R. (1991) BIOCLIM-a bioclimate analysis and prediction system. *Plant Protection Quarterly (Australia)*.
- Cai, W., Borlace, S., Lengaigne, M., van Rensch, P., Collins, M., Vecchi, G., Timmermann, A., Santoso, A., McPhaden, M.J., Wu, L., England, M.H., Wang, G., Guilyardi, E. & Jin, F.-F. (2014) Increasing frequency of extreme El Niño events due to greenhouse warming. *Nature Climate Change*, **5**, 1–6.
- Chen, J., Nolte, V. & Schlotterer, C. (2015) Temperature-Related Reaction Norms of Gene Expression: Regulatory Architecture and Functional Implications. *Molecular Biology and Evolution*.
- Chown, S.L., Jumbam, K.R., Sørensen, J.G. & Terblanche, J.S. (2009) Phenotypic variance, plasticity and heritability estimates of critical thermal limits depend on methodological context. *Functional Ecology*, **23**, 133–140.
- Cogni, R., Kuczynski, C., Koury, S., Lavington, E., Behrman, E.L., O’Brien, K.R., Schmidt, P.S. & Eanes, W.F. (2014) The Intensity of Selection Acting on the Couch Potato Gene - Spatial-Temporal Variation in a Diapause Cline. *Evolution*, **68**, 538–548.
- Cooper, B.S., Hammad, L. a., Fisher, N.P., Karty, J. a. & Montooth, K.L. (2012) In a variable

thermal environment selection favors greater plasticity of cell membranes in *Drosophila melanogaster*. *Evolution*, **66**, 1976–1984.

Cooper, B.S., Hammad, L. a & Montooth, K.L. (2014) Thermal adaptation of cellular membranes in natural populations of *Drosophila melanogaster*. *Functional Ecology*, **28**, 886–894.

Coyne, J. a., Bundgaard, J. & Prout, T. (1983) Geographic Variation of Tolerance to Environmental Stress in *Drosophila pseudoobscura*. *The American Naturalist*, **122**, 474.

Dahlgaard, J., Hasson, E. & Loescheke, V. (2001) Behavioral differentiation in oviposition activity in *Drosophila buzzatii* from highland and lowland populations in Argentina: plasticity or thermal adaptation? *Evolution*, **55**, 738–47.

Dahlhoff, E. & Somero, G.N. (1993) Effects of temperature on mitochondria from Abalone (genus *Haliotis*) - adaptive plasticity and its limits. *Journal of Experimental Biology*, **185**, 151–168.

Denny, M.W., Dowd, W.W., Bilir, L. & Mach, K.J. (2011) Spreading the risk: Small-scale body temperature variation among intertidal organisms and its implications for species persistence. *Journal of Experimental Marine Biology and Ecology*, **400**, 175–190.

Denny, M.W., Miller, L.P. & Harley, C.D.G. (2006) Thermal stress on intertidal limpets: long-term hindcasts and lethal limits. *The Journal of Experimental Biology*, **209**, 2420–2431.

Dillon, M.E., Wang, G., Garrity, P. a & Huey, R.B. (2009) Review: Thermal preference in *Drosophila*. *Journal of thermal biology*, **34**, 109–119.

Dowd, W.W., King, F.A. & Denny, M.W. (2015) Thermal variation, thermal extremes and the physiological performance of individuals. *Journal of Experimental Biology*, **218**, 1956–1967.

- Dowd, W.W. & Somero, G.N. (2013) Behavior and survival of *Mytilus* congeners following episodes of elevated body temperature in air and seawater. *The Journal of Experimental Biology*, **216**, 502–14.
- Fabian, D.K., Kapun, M., Nolte, V., Kofler, R., Schmidt, P.S., Schlötterer, C. & Flatt, T. (2012) Genome-wide patterns of latitudinal differentiation among populations of *Drosophila melanogaster* from North America. *Molecular Ecology*, **21**, 4748–69.
- Feder, M.E., Blair, N. & Figueras, H. (1997) Natural thermal stress and heat shock protein expression in *Drosophila* larvae and pupae. *Functional Ecology*, **11**, 90–100.
- Fields, P.A., Dong, Y., Meng, X. & Somero, G.N. (2015) Adaptations of protein structure and function to temperature: there is more than one way to “skin a cat.” *Journal of Experimental Biology*, **218**, 1801–1811.
- Gilchrist, G.W. & Huey, R.B. (1999) The direct response of *Drosophila melanogaster* to selection on knockdown temperature. *Heredity*, **83 ( Pt 1)**, 15–29.
- Gilchrist, G.W., Huey, R. & Partridge, L. (1997) Thermal Sensitivity of *Drosophila melanogaster*: Evolutionary Responses of Adults and Eggs to Laboratory Natural Selection at Different Temperatures. *Physiological Zoology*, **70**, 403–414.
- Graziosi, G., Micali, F., Marzari, R., de Cristini, F. & Savoini, A. (1980) Variability of response of early *Drosophila* embryos to heat shock. *The Journal of Experimental Zoology*, **214**, 141–145.
- Gunderson, A.R. & Leal, M. (2012) Geographic variation in vulnerability to climate warming in a tropical Caribbean lizard. *Functional Ecology*, **26**, 783–793.
- Hangartner, S. & Hoffmann, A. a. (2015) Evolutionary potential of multiple measures of upper thermal tolerance in *Drosophila melanogaster*. *Functional Ecology*, **30**, n/a-n/a.

- van Heerwaarden, B., Kellermann, V. & Sgrò, C.M. (2016) Limited scope for plasticity to increase upper thermal limits. *Functional Ecology*.
- Helmuth, B., Harley, C.D.G., Halpin, P.M., O'Donnell, M., Hofmann, G.E. & Blanchette, C.A. (2002) Climate change and latitudinal patterns of intertidal thermal stress. *Science*, **298**, 1015–1017.
- Hijmans, R.J., Cameron, S.E., Parra, J.L., Jones, P.G. & Jarvis, A. (2005) Very high resolution interpolated climate surfaces for global land areas. *International Journal of Climatology*, **25**, 1965–1978.
- Hilbish, T.J., Brannock, P.M., Jones, K.R., Smith, A.B., Bullock, B.N., Wethey, D.S. & Smith, A.B. (2010) Historical changes in the distributions of invasive and endemic marine invertebrates are contrary to global warming predictions: the effects of decadal climate oscillations. *Journal of Biogeography*, **37**, 423–431.
- Hoffmann, A.A. (2010) Physiological climatic limits in *Drosophila*: patterns and implications. *Journal of Experimental Biology*, **213**, 870–880.
- Hoffmann, A.A., Anderson, A. & Hallas, R. (2002) Opposing clines for high and low temperature resistance in *Drosophila melanogaster*. *Ecology Letters*, **5**, 614–618.
- Hoffmann, A.A., Chown, S.L. & Clusella-trullas, S. (2013) Upper thermal limits in terrestrial ectotherms: how constrained are they? *Functional Ecology*, **27**, 934–949.
- Hoffmann, A.A. & Weeks, A.R. (2007) Climatic selection on genes and traits after a 100 year-old invasion: A critical look at the temperate-tropical clines in *Drosophila melanogaster* from eastern Australia. *Genetica*, **129**, 133–147.
- Huey, R.B. & Pascual, M. (2009) Partial thermoregulatory compensation by a rapidly evolving invasive species along a latitudinal cline. *Ecology*, **90**, 1715–1720.

- Huey, R.B., Patridge, L. & Fowler, K. (1991) Thermal sensitivity of *Drosophila melanogaster* responds rapidly to laboratory natural selection. *Evolution*, **45**, 751–756.
- Jezkova, T. & Wiens, J.J. (2016) Rates of change in climatic niches in plant and animal populations are much slower than projected climate change. *Proceedings of the Royal Society B: Biological Sciences*, **283**, 20162104.
- Karasov, T., Messer, P.W. & Petrov, D. a. (2010) Evidence that adaptation in *Drosophila* is not limited by mutation at single sites. *PLoS genetics*, **6**, e1000924.
- Katz, R.W. & Brown, B.G. (1992) Extreme events in a changing climate: Variability is more important than averages. *Climatic Change*, **21**, 289–302.
- Kellermann, V., Overgaard, J., Hoffmann, A. a, Fløjgaard, C., Svenning, J.-C. & Loeschcke, V. (2012) Upper thermal limits of *Drosophila* are linked to species distributions and strongly constrained phylogenetically. *Proceedings of the National Academy of Sciences of the United States of America*, **109**, 16228–33.
- Kelly, M.W., Sanford, E. & Grosberg, R.K. (2012) Limited potential for adaptation to climate change in a broadly distributed marine crustacean. *Proceedings of the Royal Society B-Biological Sciences*, **279**, 349–356.
- Kingsolver, J.G., Diamond, S.E. & Buckley, L.B. (2013) Heat stress and the fitness consequences of climate change for terrestrial ectotherms. *Functional Ecology*, **27**, 1415–1423.
- Kristensen, T.N., Kjeldal, H., Schou, M.F. & Nielsen, J.L. (2016) Proteomic data reveals a physiological basis for costs and benefits associated with thermal acclimation. *Journal of Experimental Biology*, in press.
- Kristensen, T.N., Overgaard, J., Lassen, J., Hoffmann, A. a. & Sgrò, C. (2015) Low evolutionary

potential for egg-to-adult viability in *Drosophila melanogaster* at high temperatures.  
*Evolution*, **69**, 803–814.

Leemans, R., Egger, B., Loop, T., Kammermeier, L., He, H., Hartmann, B., Certa, U., Hirth, F.  
 & Reichert, H. (2000) Quantitative transcript imaging in normal and heat-shocked  
*Drosophila* embryos by using high-density oligonucleotide arrays. *Proc Natl Acad Sci U S*  
*A*, **97**, 12138–12143.

Lenski, R.E. & Bennett, A.F. (1993) Evolutionary Response of *Escherichia coli* to Thermal  
 Stress. *The American Naturalist*, **142**, S47–S64.

Leuenberger, P., Ganscha, S., Kahraman, A., Cappelletti, V., Boersema, P.J., von Mering, C.,  
 Claassen, M. & Picotti, P. (2017) Cell-wide analysis of protein thermal unfolding reveals  
 determinants of thermostability. *Science*, **355**, eaai7825.

Llewelyn, J., Macdonald, S., Hatcher, A., Moritz, C. & Phillips, B.L. (2016) Thermoregulatory  
 behaviour explains countergradient variation in the upper thermal limit of a rainforest skink.  
*Oikos*, doi:10.1111, 1–10.

Lockwood, B.L., Sanders, J.G. & Somero, G.N. (2010) Transcriptomic responses to heat-stress  
 in invasive and native blue mussels (genus *Mytilus*): molecular correlates of invasive  
 success. *The Journal of Experimental Biology*, **213**, 3548–3558.

Lockwood, B.L. & Somero, G.N. (2012) Functional determinants of temperature adaptation in  
 enzymes of cold- versus warm-adapted mussels (Genus *Mytilus*). *Molecular Biology and*  
*Evolution*, **29**, 3061–70.

Machado, H.E., Bergland, A.O., O’Brien, K.R., Behrman, E.L., Schmidt, P.S. & Petrov, D.A.  
 (2016) Comparative population genomics of latitudinal variation in *D. simulans* and *D.*  
*melanogaster*. *Molecular Ecology*.

MacLean, H.J., Higgins, J.K., Buckley, L.B. & Kingsolver, J.G. (2016) Geographic divergence in upper thermal limits across insect life stages: does behavior matter? *Oecologia*.

Meehl, G. a., Zwiers, F., Evans, J., Knutson, T., Mearns, L. & Whetton, P. (2000) Trends in extreme weather and climate events: Issues related to modeling extremes in projections of future climate change. *Bulletin of the American Meteorological Society*, **81**, 427–436.

Miller, N. a. & Stillman, J.H. (2012) Neural Thermal Performance in Porcelain Crabs, Genus *Petrolisthes*. *Physiological and Biochemical Zoology*, **85**, 29–39.

Mitchell, K. a. & Hoffmann, A. a. (2010) Thermal ramping rate influences evolutionary potential and species differences for upper thermal limits in *Drosophila*. *Functional Ecology*, **24**, 694–700.

Mongold, J.A., Bennett, A.F. & Lenski, R.E. (1999) Evolutionary adaptation to temperature. VII. Extension of the upper thermal limit of *Escherichia coli*. *Evolution*, **53**, 386–394.

Morgan, T. & Mackay, T. (2006) Quantitative trait loci for thermotolerance phenotypes in *Drosophila melanogaster*. *Heredity*, **96**, 232–242.

Munoz, M.M., Langham, G.M., Brandley, M.C., Rosauer, D.F., Williams, S.E. & Moritz, C. (2016) Basking behavior predicts the evolution of heat tolerance in Australian rainforest lizards. *Evolution*, **70**, 2537–2549.

Pereira, R.J., Barreto, F.S. & Burton, R.S. (2014) Ecological novelty by hybridization: Experimental evidence for increased thermal tolerance by transgressive segregation in *Tigriopus californicus*. *Evolution*, **68**, 204–215.

Rank, N.E. & Dahlhoff, E.P. (2002) Allele frequency shifts in response to climate change and physiological consequences of allozyme variation in a montane insect. *Evolution*, **56**, 2278–2289.



- Rudolph, B., Gebendorfer, K.M., Buchner, J. & Winter, J. (2010) Evolution of *Escherichia coli* for Growth at High Temperatures. *Journal of Biological Chemistry*, **285**, 19029–19034.
- Sambucetti, P., Scannapieco, a C., Loeschcke, V. & Norry, F.M. (2013) Heat-stress survival in the pre-adult stage of the life cycle in an intercontinental set of recombinant inbred lines of *Drosophila melanogaster*. *The Journal of Experimental Biology*, **216**, 2953–9.
- Sato, A., Kawashima, T., Fujie, M., Hughes, S., Satoh, N. & Shimeld, S.M. (2015) Molecular basis of canalization in an ascidian species complex adapted to different thermal conditions. *Scientific Reports*, **5**, 1–9.
- Schou, M.F., Kristensen, T.N., Kellermann, V., Schlöter, C. & Loeschcke, V. (2014) A *Drosophila* laboratory evolution experiment points to low evolutionary potential under increased temperatures likely to be experienced in the future. *Journal of Evolutionary Biology*, **27**.
- Sgro, C.M., Overgaard, J., Kristensen, T.N., Mitchell, K.A., Cockerell, F.E. & Hoffmann, A.A. (2010) A comprehensive assessment of geographic variation in heat tolerance and hardening capacity in populations of *Drosophila melanogaster* from Eastern Australia. *Journal of Evolutionary Biology*, **23**, 2484–2493.
- Somero, G.N. (2002) Thermal Physiology and Vertical Zonation of Intertidal Animals: Optima, Limits, and Costs of Living. *Integrative and Comparative Biology*, **42**, 780–789.
- Stenseng, E., Braby, C.E., Somero, G.N. & Anonymous. (2005) Evolutionary and acclimation-induced variation in the thermal limits of heart function in congeneric marine snails (Genus *Tegula*): Implications for vertical zonation. *Biological Bulletin (Woods Hole)*, **208**, 138–144.
- Stillman, J.H. & Somero, G.N. (2000) A comparative analysis of the upper thermal tolerance limits of eastern Pacific porcelain crabs, genus *Petrolisthes*: influences of latitude, vertical

zonation, acclimation, and phylogeny. *Physiological and Biochemical Zoology*, **73**, 200–208.

Sunday, J.M., Bates, A.E. & Dulvy, N.K. (2011) Global analysis of thermal tolerance and latitude in ectotherms. *Proceedings. Biological sciences / The Royal Society*, **278**, 1823–30.

Sunday, J.M., Bates, A.E. & Dulvy, N.K. (2012) Thermal tolerance and the global redistribution of animals. *Nature Climate Change*, **2**, 686–690.

Svetec, N., Cridland, J.M., Zhao, L. & Begun, D.J. (2016) The Adaptive Significance of Natural Genetic Variation in the DNA Damage Response of *Drosophila melanogaster*. *PLOS Genetics*, **12**, e1005869.

Tadros, W. & Lipshitz, H.D. (2009) The maternal-to-zygotic transition: a play in two acts. *Development (Cambridge, England)*, **136**, 3033–42.

Team, R.C. (2016) *R: A Language and Environment for Statistical Computing*. R Foundation for Statistical Computing, Vienna, Austria.

Terblanche, J.S., Hoffmann, A.A., Mitchell, K.A., Rako, L., le Roux, P.C. & Chown, S.L. (2011) Ecologically relevant measures of tolerance to potentially lethal temperatures. *Journal of Experimental Biology*, **214**, 3713–3725.

Thomas, M.K., Kremer, C.T., Klausmeier, C. a & Litchman, E. (2012) A global pattern of thermal adaptation in marine phytoplankton. *Science*, **338**, 1085–1088.

Tomanek, L. & Zuzow, M.J. (2010) The proteomic response of the mussel congeners *Mytilus galloprovincialis* and *M. trossulus* to acute heat stress: implications for thermal tolerance limits and metabolic costs of thermal stress. *The Journal of experimental biology*, **213**, 3559–3574.

Walter, M.F., Biessmann, H. & Petersen, N.S. (1990) Heat shock causes the collapse of the

intermediate filament cytoskeleton in *Drosophila* embryos. *Developmental genetics*, **11**,  
270–279.

Welte, M.A., Tetrault, J.M., Dellavalle, R.I.P. & Lindquist, S.L. (1993) A new method for  
manipulating transgenes: engineering heat tolerance in a complex, multicellular organism.  
*Current Biology*, **3**, 842–853.

Yao, C.-L. & Somero, G.N. (2012) The impact of acute temperature stress on hemocytes of  
invasive and native mussels (*Mytilus galloprovincialis* and *Mytilus californianus*): DNA  
damage, membrane integrity, apoptosis and signaling pathways. *The Journal of*  
*Experimental Biology*, **215**, 4267–77.

## Figures

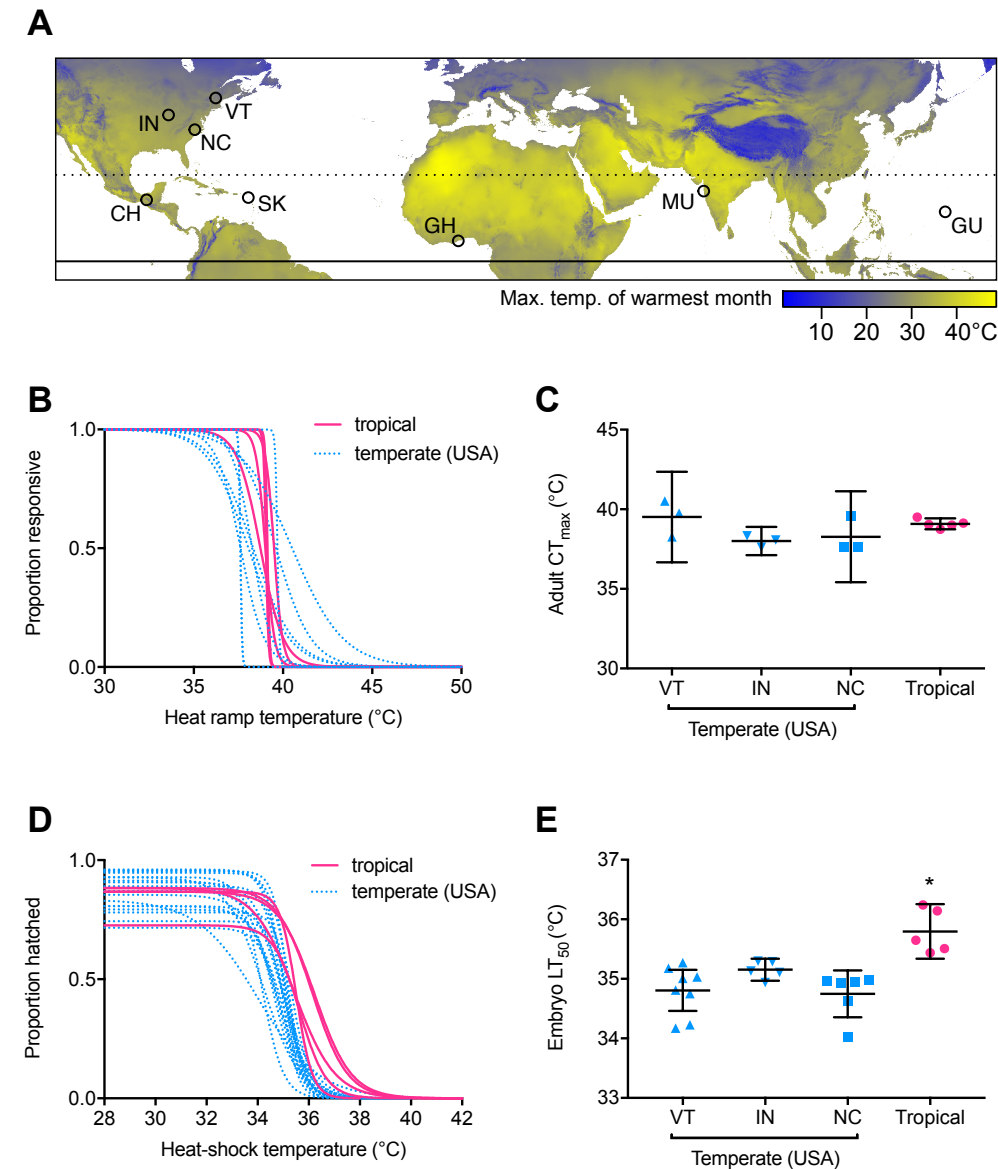

**Figure 1.**

**Flies from different populations around the world exhibited differences in embryonic thermal tolerance but not adult thermal tolerance.**

**(A)** Sampling locations of isofemale lines. Color indicates maximum temperature of warmest month ( $T_{max}$ ), extrapolated from the WorldClim database. Tropical populations lie between the

Equator (solid horizontal line) and the Tropic of Cancer (dotted horizontal line) and were sampled in Chiapas, Mexico (CH), Saint Kitts (SK), Accra, Ghana (GH), Mumbai, India (MU), and Guam (GU). Temperate populations lie north of the Tropic of Cancer and were sampled in Vermont (VT), Indiana (IN), and North Carolina (NC). **(B)** Proportion of adult male flies responsive along a heat ramp ( $+1^{\circ}\text{C min}^{-1}$  from  $25^{\circ}\text{C}$ ). Tropical lines are indicated in solid pink. Temperate lines are indicated in dotted blue. **(C)** Adult male  $\text{CT}_{\text{max}}$  was consistent across all populations (ANOVA,  $F_{3,9} = 2.378$ ,  $P = 0.1375$ ).  $\text{CT}_{\text{max}}$  extrapolated from the survival curves in B. Solid horizontal lines show means. Error bars indicate 95% confidence intervals. **(D)** Proportion of eggs successfully hatched following heat shock (45 min at indicated temperature). Tropical lines are indicated in solid pink. Temperate lines are indicated in dotted blue. **(E)** Embryonic thermal tolerance ( $\text{LT}_{50}$ ) was higher in tropical lines than temperate lines (ANOVA,  $F_{3,20} = 10.16$ ,  $P = 0.0003$ ; Tukey's test, VT vs. IN,  $q = 2.428$ ,  $P = 0.3416$ , VT vs. NC,  $q = 0.4268$ ,  $P = 0.9902$ , IN vs. NC,  $q = 2.666$ ,  $P = 0.2656$ , tropical vs. VT,  $q = 6.909$ ,  $P = 0.0005$ , tropical vs. IN,  $q = 4.04$ ,  $P = 0.0444$ , tropical vs. NC,  $q = 4.04$ ,  $P = 0.0005$ ).  $\text{LT}_{50}$  extrapolated from the survival curves in D. Solid horizontal lines show means. Error bars indicate 95% confidence intervals.  $*P < 0.05$ .

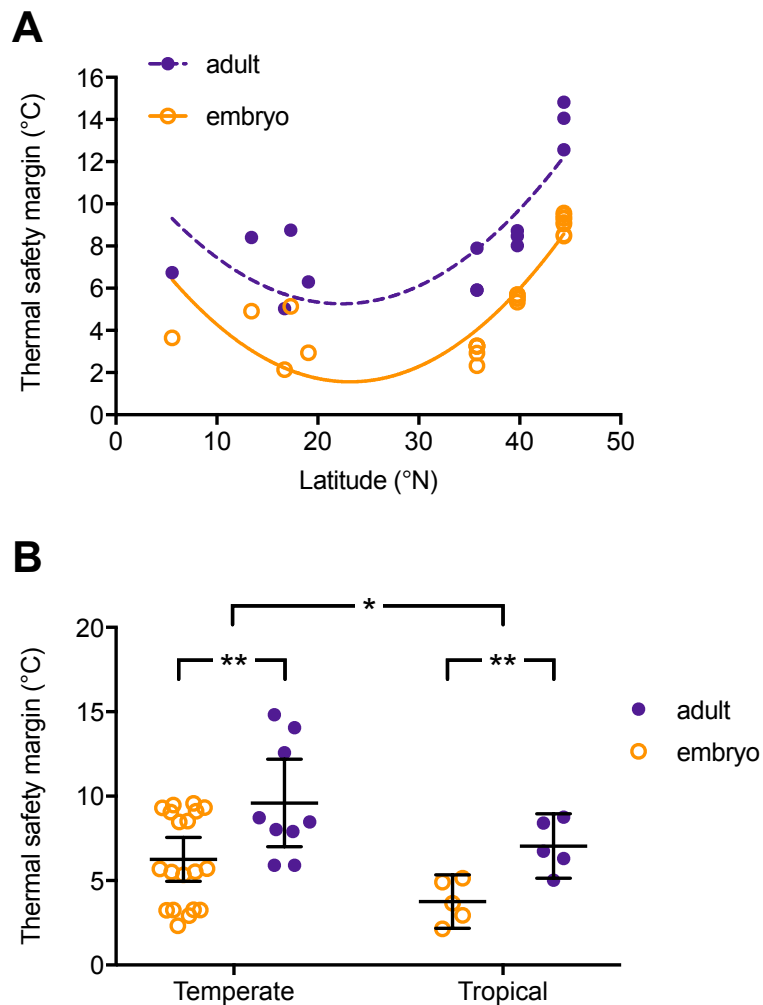

**Figure 2.**

**Thermal safety margin differs by life stage and geographic region.**

(A) Thermal safety margins were smaller for embryos than adults across latitude (Extra sum-of-squares F-test on fitness of two curves,  $F_{3,32} = 15.95$ ,  $P < 0.0001$ ; Non-linear least-squares regression, embryo,  $R^2 = 0.8019$ ,  $y = 0.01563x^2 - 0.7249x + 9.97$ , adult,  $R^2 = 0.6359$ ,  $y = 0.01437x^2 - 0.6424x + 12.44$ ). Adults are indicated in purple filled circles with dashed purple regression line. Embryos are indicated in orange open circles with solid orange regression line.

(B) Thermal safety margins were smaller for embryos than adults and smaller in the tropics than temperate sites (ANOVA, main effect of region,  $F_{1,34} = 6.482$ ,  $P = 0.0156$ , main effect of life

620 stage,  $F_{1,34} = 11.15$ ,  $P = 0.002$ , region x life stage interaction,  $F_{1,34} = 0.0006$ ,  $P = 0.98$ ). Adults  
 621 are indicated in purple filled circles, and embryos are indicated in orange open circles. Solid  
 622 horizontal lines show means. Error bars indicate 95% confidence intervals.  $*P < 0.05$ ,  $**P <$   
 623 0.01.

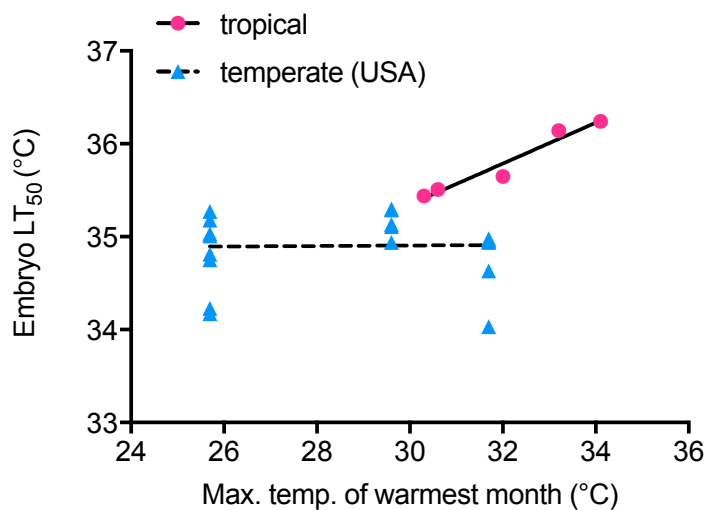

**Figure 3.**

**Embryonic thermal tolerance and maximum habitat temperature ( $T_{\max}$ ) by region.**

Embryonic thermal tolerance was positively correlated with  $T_{\max}$  among tropical populations (Least-squares regression,  $R^2 = 0.9478$ ,  $P = 0.0051$ ,  $y = 0.2199x + 28.75$ ) but not temperate populations (Least-squares regression,  $R^2 = 0.0015$ ,  $P = 0.9751$ ,  $y = 0.00282x + 34.82$ ). Tropical genotypes are indicated in pink circles, with a solid black regression line fit. Temperate genotypes are indicated in blue triangles, with a dashed black regression line fit.



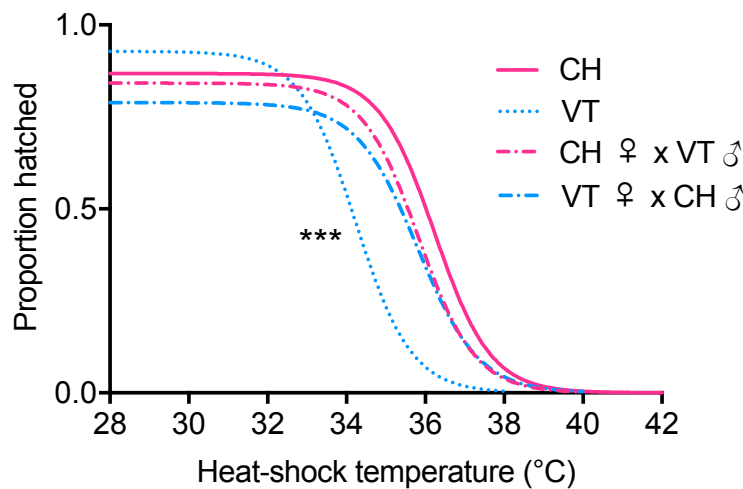

**Figure 4.**

**F1 progeny from tropical x temperate parents have high embryonic heat tolerance.**

Proportion of eggs successfully hatched following heat shock (45 min at indicated temperature) among two parental genotypes that had the highest and lowest  $LT_{50}$  of all strains in this study, CH (Chiapas, Mexico) and VT-12 (Vermont, USA), respectively, along with F1 progeny from reciprocal crosses of these two parental lines, CH ♀ x VT ♂ and VT ♀ x CH ♂ (♀ = dam; ♂ = sire). Note that VT-12 is labeled “VT” in the legend.  $LT_{50}$ : CH = 36.24°C, VT-12 = 34.23°C, CH ♀ x VT ♂ = 35.83°C, VT ♀ x CH ♂ = 35.80°C (Logistic model, Extra sum-of-squares F-test on lower  $LT_{50}$  of VT-12,  $F_{3,166} = 6.695$ , \*\*\* $P = 0.0003$ ).

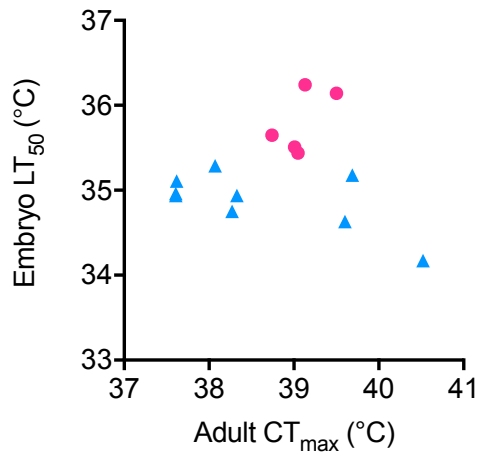

# Supplemental Figure S1.

**No significant relationship between adult  $CT_{max}$  and embryo  $LT_{50}$ .**

Adult thermal tolerance and embryonic thermal tolerance were not correlated among all isofemale lines (Least-squares linear regression,  $R^2 = 0.0005$ ). Tropical isofemale lines are shown in pink circles and temperate isofemale lines are shown in blue triangles.

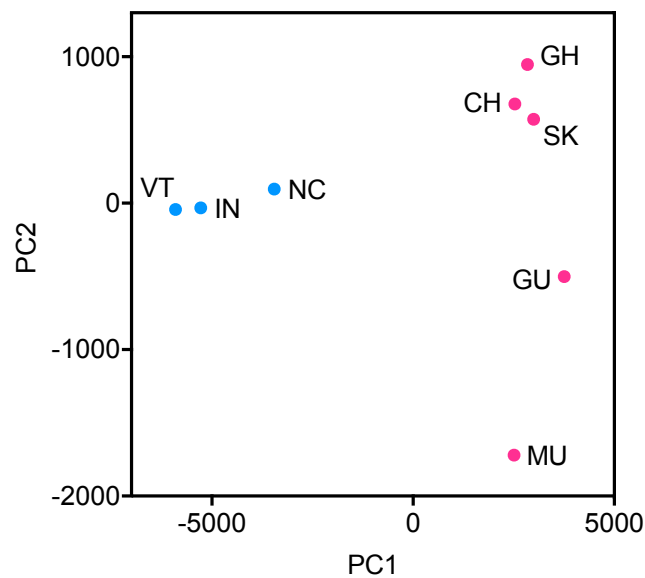

## Supplemental Figure S2.

### Principal components analysis of 19 Bioclim variables at each of the 8 collection sites.

Plotted are scores of the first two principle components (PC1 vs. PC2), which describe the major axes of variation in 19 bioclimatic variables among the collection sites. PC1 and PC2 explained 95.6% and 4%, respectively, of the variation in climate among sites. Temperature seasonality was the top component loading on PC1, explaining 98% of the variation in PC1, and annual precipitation was the top component loading on PC2, explaining 49% of the variation in PC2.

Temperate sites are shown in blue and tropical sites in pink.

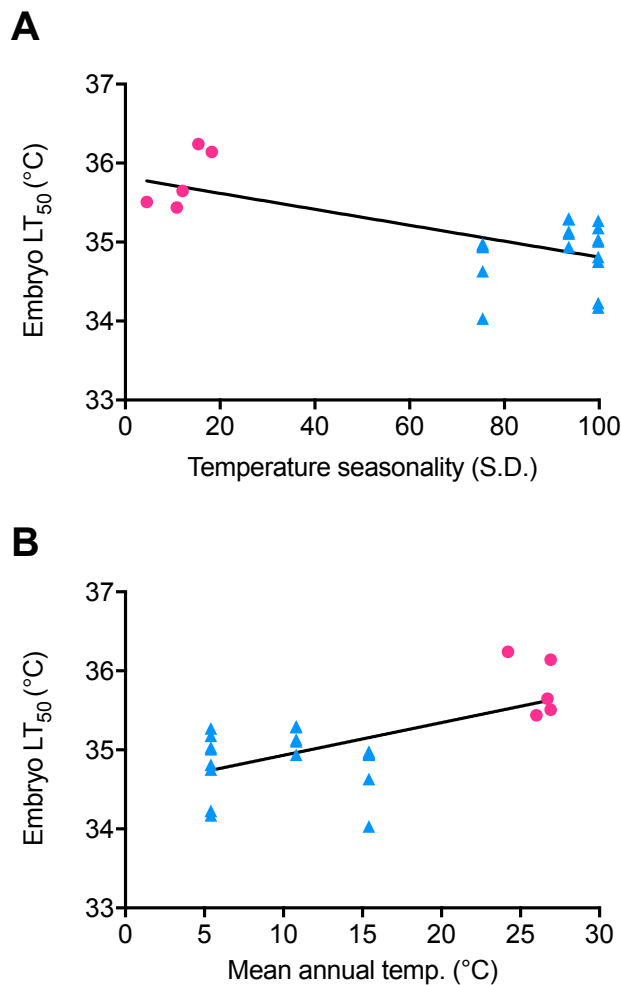

661

662 **Supplemental Figure S3.**

663 **Relationship between embryonic thermal tolerance and (A) temperature seasonality and**

664 **(B) mean annual temperature.**

665 (A) Temperature seasonality is the standard deviation in temperature ( $^{\circ}C$ ) over the course of the

666 year, averaged across the years 1960 to 1990 for each of the sites. Solid black line represents the

667 regression line fit, which had a significantly negative slope (Least-squares linear regression,  $R^2 =$

668  $0.42$ ,  $P = 0.0006$ ,  $y = -0.01x + 35.82$ ). (B) Mean annual temperature is the average yearly

669 temperature from 1960 to 1990 for each of the sites. Solid black line represents the regression

670 line fit, which had a significantly positive slope (Least-squares linear regression,  $R^2 = 0.37$ ,  $P =$   
671  $0.0016$ ,  $y = 0.041x + 34.52$ ). In both A and B, tropical isofemale lines are shown in pink circles  
672 and temperate isofemale lines are shown in blue triangles.  
673

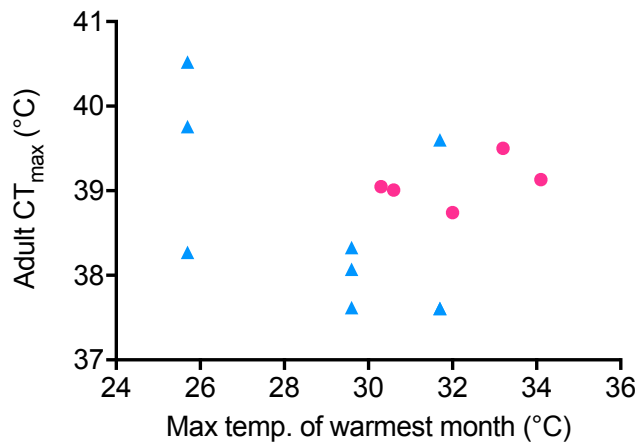

#### Supplemental Figure S4.

**No significant relationship between adult thermal tolerance (CT<sub>max</sub>) and maximum habitat temperature (T<sub>max</sub>).**

Variation in adult thermal tolerance showed no correspondence to variation in T<sub>max</sub> among all collection sites (Least-squares linear regression,  $R^2 = 0.055$ ). Tropical isofemale lines are shown in pink circles and temperate isofemale lines are shown in blue triangles.

## Tables

### Supplemental Table S1.

Stock information, collection locales, and thermal tolerance data for isofemale lines used in this study.

| Stock No.      | Locale          | State/Country       | Lat. (°N) | Long. (°E) | Adult CT <sub>max</sub> (°C) | Embryo LT <sub>50</sub> (°C) |
|----------------|-----------------|---------------------|-----------|------------|------------------------------|------------------------------|
| VTECK_2        | East Calais     | Vermont, USA        | 44.3664   | -72.4300   | 39.69                        | 35.18                        |
| VTECK_4        | East Calais     | Vermont, USA        | 44.3664   | -72.4300   | -                            | 35.03                        |
| VTECK_5        | East Calais     | Vermont, USA        | 44.3664   | -72.4300   | 38.27                        | 34.75                        |
| VTECK_8        | East Calais     | Vermont, USA        | 44.3664   | -72.4300   | -                            | 34.81                        |
| VTECK_9        | East Calais     | Vermont, USA        | 44.3664   | -72.4300   | -                            | 35.27                        |
| VTECK_10       | East Calais     | Vermont, USA        | 44.3664   | -72.4300   | 40.52                        | 34.17                        |
| VTECK_12       | East Calais     | Vermont, USA        | 44.3664   | -72.4300   | -                            | 34.23                        |
| VTECK_14       | East Calais     | Vermont, USA        | 44.3664   | -72.4300   | -                            | 35.01                        |
| BEA_5          | Beasley Orchard | Indiana, USA        | 39.7637   | -86.4766   | -                            | 35.13                        |
| BEA_16         | Beasley Orchard | Indiana, USA        | 39.7637   | -86.4766   | 37.62                        | 35.11                        |
| BEA_21         | Beasley Orchard | Indiana, USA        | 39.7637   | -86.4766   | 38.33                        | 34.94                        |
| BEA_32         | Beasley Orchard | Indiana, USA        | 39.7637   | -86.4766   | -                            | 35.30                        |
| BEA_36         | Beasley Orchard | Indiana, USA        | 39.7637   | -86.4766   | 38.07                        | 35.29                        |
| RFM_4          | Raleigh         | North Carolina, USA | 35.7636   | -78.6627   | -                            | 34.98                        |
| RFM_6          | Raleigh         | North Carolina, USA | 35.7636   | -78.6627   | -                            | 34.95                        |
| RFM_16         | Raleigh         | North Carolina, USA | 35.7636   | -78.6627   | -                            | 34.03                        |
| RFM_19         | Raleigh         | North Carolina, USA | 35.7636   | -78.6627   | 39.60                        | 34.63                        |
| RFM_34         | Raleigh         | North Carolina, USA | 35.7636   | -78.6627   | 37.61                        | 34.96                        |
| RFM_48         | Raleigh         | North Carolina, USA | 35.7636   | -78.6627   | 37.61                        | 34.94                        |
| 14021-0231.22  | Chiapa de Corzo | Chiapas, Mexico     | 16.7022   | -93.0081   | 39.13                        | 36.24                        |
| 14021-0231.34  | Monkey Hill     | St. Kitts           | 17.3240   | -62.7250   | 39.05                        | 35.44                        |
| 14021-0231.182 | Accra           | Ghana               | 5.5557    | -0.1963    | 38.74                        | 35.65                        |
| 14021-0231.45  | Mumbai          | Maharashtra, India  | 19.0760   | 72.8777    | 39.50                        | 36.14                        |
| 14021-0231.198 | Guam            | Guam, USA           | 13.4443   | 144.7937   | 39.01                        | 35.51                        |
